# Supplementary material
Source: publisher figshare collection journal article supplement (https://acs.figshare.com/ndownloader/files/4795411)
Supplement: Supplementary file 1 [file 4795411]

1     **The Effect of V<sub>2</sub>O<sub>5</sub> Additive on the SO<sub>2</sub> Resistance of Fe<sub>2</sub>O<sub>3</sub>/AC**  
2             **Catalyst for NH<sub>3</sub>-SCR of NO<sub>x</sub> at Low Temperatures**

3             Weiwei Yang, Fudong Liu\*†, Lijuan Xie, Zhihua Lian‡, Hong He\*

4             Research Center for Eco-Environmental Sciences, Chinese Academy of Sciences

5             18 Shuangqing Road, Haidian District, Beijing 100085, P.R. China.

6     \* Corresponding authors: lfd1982@gmail.com (F. Liu); honghe@rcees.ac.cn (H. He).

7             Fax: +86 10 62849123; Tel: +86 10 62849123.

8     †present address: BASF Corporation, 25 Middlesex/Essex Turnpike, Iselin, NJ 08830,

9             U.S.A.

10     ‡present address: Institute of Urban Environment, Chinese Academy of Sciences.

11             1799 Jimei Road, Xiamen, 361021, China.

**Table S1.** ICP-OES of catalysts

| Loadings (%)                   | 3% Fe | 3% Fe-0.3% V | 3% Fe-0.5% V | 3% Fe-0.7% V |
|--------------------------------|-------|--------------|--------------|--------------|
| Fe <sub>2</sub> O <sub>3</sub> | 3.16  | 3.07         | 3.40         | 3.37         |
| V <sub>2</sub> O <sub>5</sub>  | —     | 0.30         | 0.52         | 0.68         |

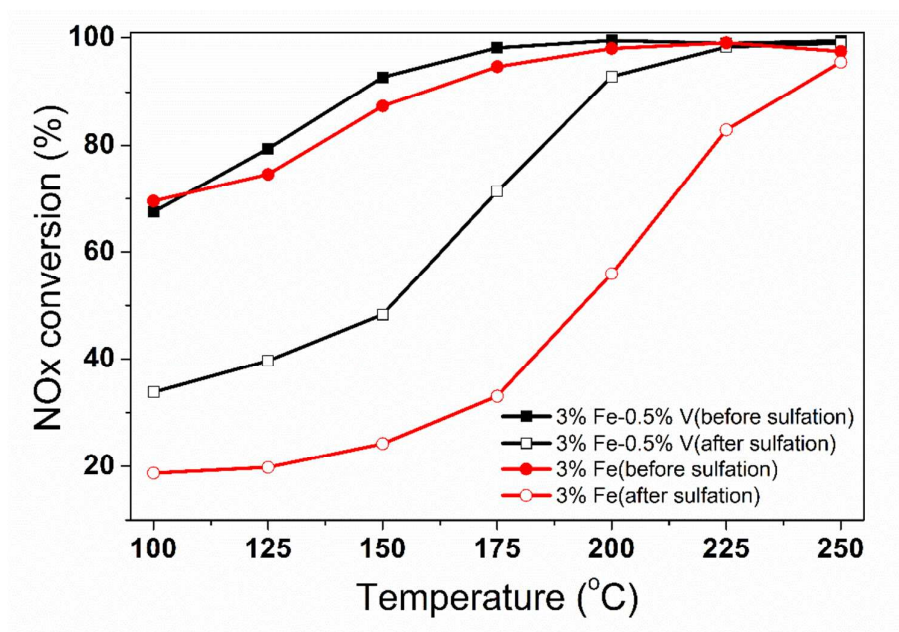

**Figure S1.** NH<sub>3</sub>-SCR activity over 3% Fe/AC and 3% Fe -0.5%V/AC catalysts before and after sulfation by 100 ppm SO<sub>2</sub>. Reaction conditions: 500 ppm NO, 500 ppm NH<sub>3</sub>, 5% O<sub>2</sub>, N<sub>2</sub> balance, GHSV, 20000 h<sup>-1</sup>.

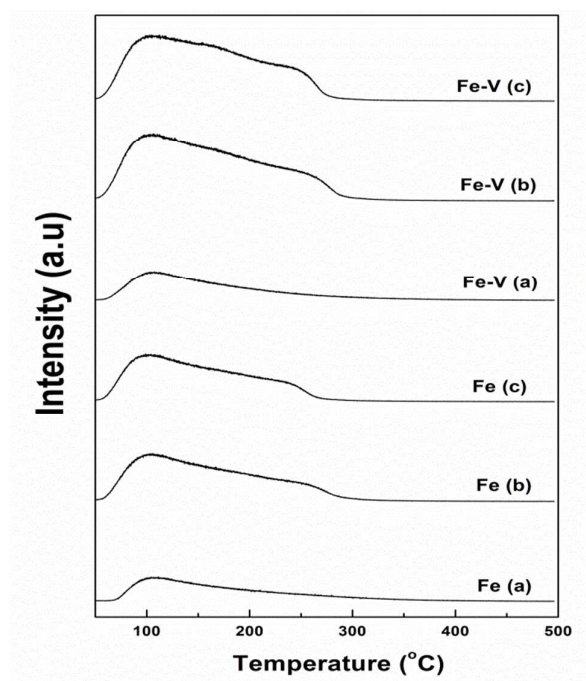

**Figure S2.** NH<sub>3</sub>-TPD patterns for fresh and sulfated 3% Fe and 3% Fe-0.5% V. (a), (b), (c) represent fresh catalyst and catalyst after SCR reaction in the presence of SO<sub>2</sub> and in the presence of SO<sub>2</sub> + H<sub>2</sub>O, respectively, as shown in Fig. 3.

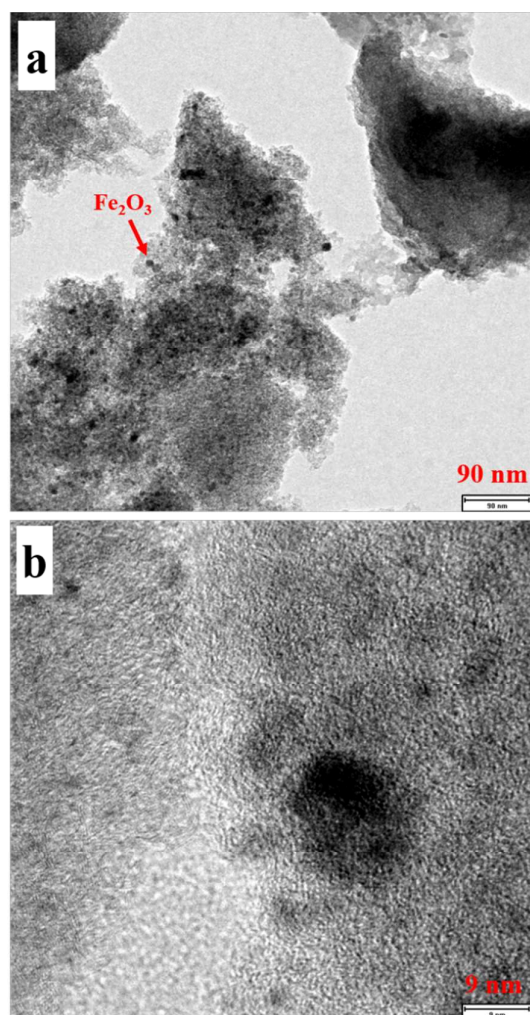

**Figure S3.** TEM images of 3% Fe-0.5%V catalyst: a and b are different magnifications of the same sample.
